# Supplementary material for: Human Recombinant Arginase I [HuArgI (Co)-PEG5000]-Induced Arginine Depletion Inhibits Colorectal Cancer Cell Migration and Invasion
Source: PubMed Central journal article supplement (PMC6929075; doi:10.3390/ijms20236018), 2019-11-29
Supplement: ijms-20-06018-s001.pdf [file ijms-20-06018-s001.pdf]

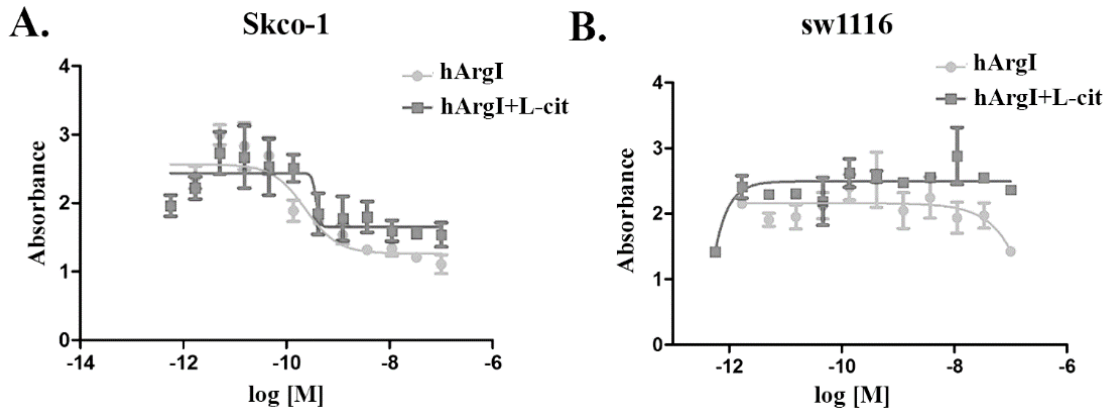

**Supplemental Figure S1.** HuArgI(Co)-PEG5000 effect on (A) Skco-1 and (B) sw1116 cells. Non-linear regression curve of the cytotoxicity of Skco-1 and sw1116 cells treated with HuArgI(Co)-PEG5000 alone (square) at concentration ranging from  $10^{-12}$  to  $10^{-7}$  M or with L-citrulline (11.4 mM) (triangle) at time 72 h.

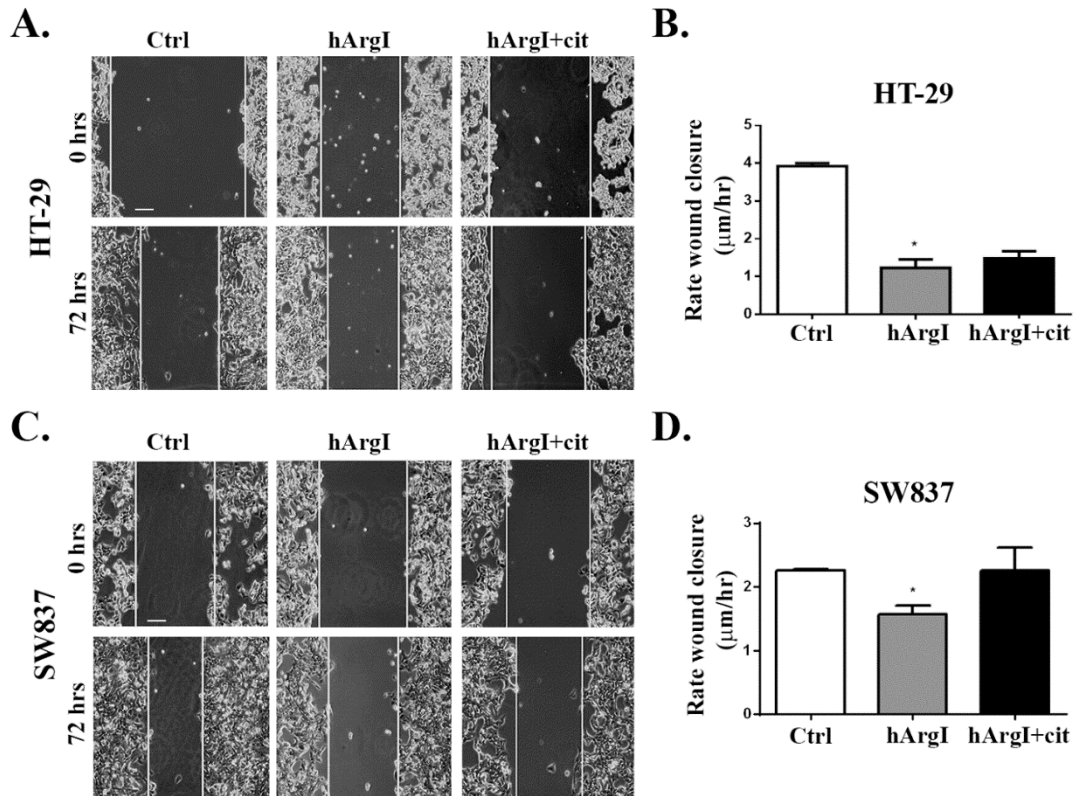

**Supplemental Figure S2.** HuArgI(Co)-PEG5000 inhibits motility in HT-29 and SW837 cells. HT-29 and SW837 cell lines were treated with HuArgI(Co)-PEG5000 (100 pM) with or without L-citrulline (11.4 mM). Cell monolayers were wounded and images were taken at time 0 hr and 72 h. (A and C) Representative wound closure of HT-29 (A) and Sw837 cells (C), respectively. (B and D) Frames in (A) and (C) were quantitated using ImageJ. The width of each wound was measured at 11 different points. The average rate of wound closure was calculated and expressed as  $\mu\text{m}/\text{h}$ . data are the mean  $\pm$  SEM.  $p < 0.05$  indicates a statistically significant difference. \*  $p < 0.05$ . Scale bar is 100  $\mu\text{m}$ .
